# Supplementary material
Source: HighWire-hosted journal article supplement (https://erj.ersjournals.com/content/57/4/2003448)
Supplement: inline-supplementary-material-1 [file inline-supplementary-material-1.pdf]

**Supplementary Table S1. Univariate associations between main outcomes and age, gender and severity indices during COVID-19.**

|                                             | OR (95% CI)      | p     |
|---------------------------------------------|------------------|-------|
| <i>Dyspnea (mMRC&gt;0 vs. mMRC=0, n=69)</i> |                  |       |
| Male gender                                 | 0.41 (0.15-1.08) | 0.071 |
| Age per 10 year                             | 0.87 (0.63-1.21) | 0.410 |
| ICU admission                               | 0.55 (0.16-1.97) | 0.355 |
| Ventilator treatment                        | 0.60 (0.12-2.89) | 0.520 |
| Length of stay                              | 0.98 (0.94-1.02) | 0.325 |
| CRP max per 10mg/dL                         | 0.99 (0.95-1.04) | 0.689 |
| D-dimer max                                 | 1.07 (0.86-1.32) | 0.557 |

*Gas diffusion capacity (DL<sub>CO</sub> <LLN vs. DL<sub>CO</sub> ≥LLN, n=102)*

|                      |                  |       |
|----------------------|------------------|-------|
| History of smoking   | 1.47 (0.58-3.72) | 0.411 |
| ICU admission        | 1.36 (0.39-4.80) | 0.633 |
| Ventilator treatment | 1.75 (0.40-7.62) | 0.456 |
| Length of stay       | 1.01 (0.98-1.04) | 0.562 |
| CRP max per 10g/L    | 1.04 (0.99-1.09) | 0.099 |
| D-dimer max          | 1.17 (0.92-1.49) | 0.188 |

*GGO in chest CT (>10% GGO in ≥1 zone vs. none, n=101)*

|                 |                  |       |
|-----------------|------------------|-------|
| Male gender     | 1.05 (0.43-2.61) | 0.908 |
| Age per 10 year | 1.60 (1.12-2.26) | 0.009 |

|                      |                  |       |
|----------------------|------------------|-------|
| ICU admission        | 2.64 (0.82-8.56) | 0.105 |
| Ventilator treatment | 3.63 (0.83-15.9) | 0.087 |
| Length of stay       | 1.03 (0.99-1.08) | 0.117 |
| CRP max per 10mg/dL  | 1.09 (1.04-1.15) | 0.001 |
| D-dimer max          | 1.38 (0.97-1.97) | 0.072 |

*Parenchymal bands in chest CT (yes vs. no, n=101)*

|                      |                  |       |
|----------------------|------------------|-------|
| Male gender          | 1.41 (0.52-3.87) | 0.505 |
| Age per 10 year      | 1.10 (0.78-1.56) | 0.588 |
| ICU admission        | 2.86 (0.83-9.81) | 0.095 |
| Ventilator treatment | 4.87 (1.09-21.7) | 0.038 |
| Length of stay       | 1.03 (0.99-1.07) | 0.129 |
| CRP max per 10mg/dL  | 1.06 (1.01-1.12) | 0.018 |
| D-dimer max          | 1.29 (0.94-1.78) | 0.120 |

OR, odds ratio; CI, confidential interval; mMRC, modified Medical Research Council dyspnoea scale; ICU, intensive care unit; CRP, C-reactive protein; DL<sub>CO</sub>, diffusion capacity of the lungs for carbon monoxide; LLN, lower limit of normal; CT, computed tomography; GGO, ground glass opacities;
