# Supplementary material
Source: HighWire-hosted journal article supplement (https://erj.ersjournals.com/content/57/4/2003448)
Supplement: inline-supplementary-material-2 [file inline-supplementary-material-2.pdf]

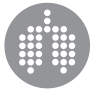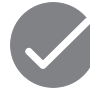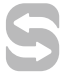

SHAREABLE PDF

# Dyspnoea, lung function and CT findings 3 months after hospital admission for COVID-19

Tøri Vigeland Lerum<sup>1</sup>, Trond Mogens Aaløkken<sup>2,3</sup>, Eivind Brønstad<sup>4,5</sup>,  
Bernt Aarli<sup>6,7</sup>, Eirik Ikdahl<sup>8</sup>, Kristine Marie Aarberg Lund<sup>9</sup>,  
Michael T. Durheim<sup>3,10</sup>, Jezabel Rivero Rodriguez<sup>2</sup>, Carin Meltzer<sup>2</sup>,  
Kristian Tonby<sup>3,11</sup>, Knut Stavem <sup>3,8,12</sup>, Ole Henning Skjønsberg<sup>1,3</sup>,  
Haseem Ashraf<sup>3,13,14</sup> and Gunnar Einvik<sup>3,8,14</sup>

**Affiliations:** <sup>1</sup>Dept of Pulmonary Medicine, Oslo University Hospital Ullevål, Oslo, Norway. <sup>2</sup>Dept of Radiology and Nuclear Medicine, Oslo University Hospital Ullevål, Oslo, Norway. <sup>3</sup>Institute for Clinical Medicine, University of Oslo, Oslo, Norway. <sup>4</sup>Thoracic Dept, St Olavs Hospital, Trondheim, Norway. <sup>5</sup>Dept of Circulation and Medical Imaging, Faculty of Medicine and Health Sciences NTNU, Trondheim, Norway. <sup>6</sup>Dept of Thoracic Medicine, Haukeland University Hospital, Haukeland, Norway. <sup>7</sup>Dept of Clinical Science, University of Bergen, Bergen, Norway. <sup>8</sup>Pulmonary Dept, Akershus University Hospital, Lørenskog, Norway. <sup>9</sup>Dept of Infectious Diseases, Østfold Hospital Trust Kalnes, Grålum, Norway. <sup>10</sup>Dept of Respiratory Medicine, Oslo University Hospital Rikshospitalet, Oslo, Norway. <sup>11</sup>Dept of Infectious Diseases, Oslo University Hospital Ullevål, Oslo, Norway. <sup>12</sup>Health Services Research Unit, Akershus University Hospital, Lørenskog, Norway. <sup>13</sup>Dept of Diagnostic Imaging, Akershus University Hospital, Lørenskog, Norway. <sup>14</sup>Shared last authors.

**Correspondence:** Gunnar Einvik, Pulmonary Dept, Akershus University Hospital, 1470 Lørenskog, Norway. E-mail [gunnar.einvik@medisin.uio.no](mailto:gunnar.einvik@medisin.uio.no)

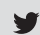

@ERSpublications

**3 months after discharge, a quarter of COVID-19 survivors have reduced gas diffusion capacity and persistent parenchymal opacities. ICU treatment is associated with persistent parenchymal opacities, but not with dyspnoea or reduced diffusing capacity.** <https://bit.ly/2J3xH4x>

**Cite this article as:** Lerum TV, Aaløkken TM, Brønstad E, *et al.* Dyspnoea, lung function and CT findings 3 months after hospital admission for COVID-19. *Eur Respir J* 2021; 57: 2003448 [<https://doi.org/10.1183/13993003.03448-2020>].

This single-page version can be shared freely online.

**ABSTRACT** The long-term pulmonary outcomes of coronavirus disease 2019 (COVID-19) are unknown. We aimed to describe self-reported dyspnoea, quality of life, pulmonary function and chest computed tomography (CT) findings 3 months following hospital admission for COVID-19. We hypothesised outcomes to be inferior for patients admitted to intensive care units (ICUs), compared with non-ICU patients.

Discharged COVID-19 patients from six Norwegian hospitals were enrolled consecutively in a prospective cohort study. The current report describes the first 103 participants, including 15 ICU patients. The modified Medical Research Council (mMRC) dyspnoea scale, the EuroQol Group's questionnaire, spirometry, diffusing capacity of the lung for carbon monoxide ( $D_{LCO}$ ), 6-min walk test, pulse oximetry and low-dose CT scan were performed 3 months after discharge.

mMRC score was  $>0$  in 54% and  $>1$  in 19% of the participants. The median (25th–75th percentile) forced vital capacity and forced expiratory volume in 1 s were 94% (76–121%) and 92% (84–106%) of predicted, respectively.  $D_{LCO}$  was below the lower limit of normal in 24% of participants. Ground-glass opacities (GGO) with  $>10\%$  distribution in at least one of four pulmonary zones were present in 25% of participants, while 19% had parenchymal bands on chest CT. ICU survivors had similar dyspnoea scores

and pulmonary function as non-ICU patients, but higher prevalence of GGO (adjusted OR 4.2, 95% CI 1.1–15.6) and lower performance in usual activities.

3 months after admission for COVID-19, one-fourth of the participants had chest CT opacities and reduced diffusing capacity. Admission to ICU was associated with pathological CT findings. This was not reflected in increased dyspnoea or impaired lung function.
